# Supplementary material
Source: PubMed Central journal article supplement (PMC7010551)

Figure S1

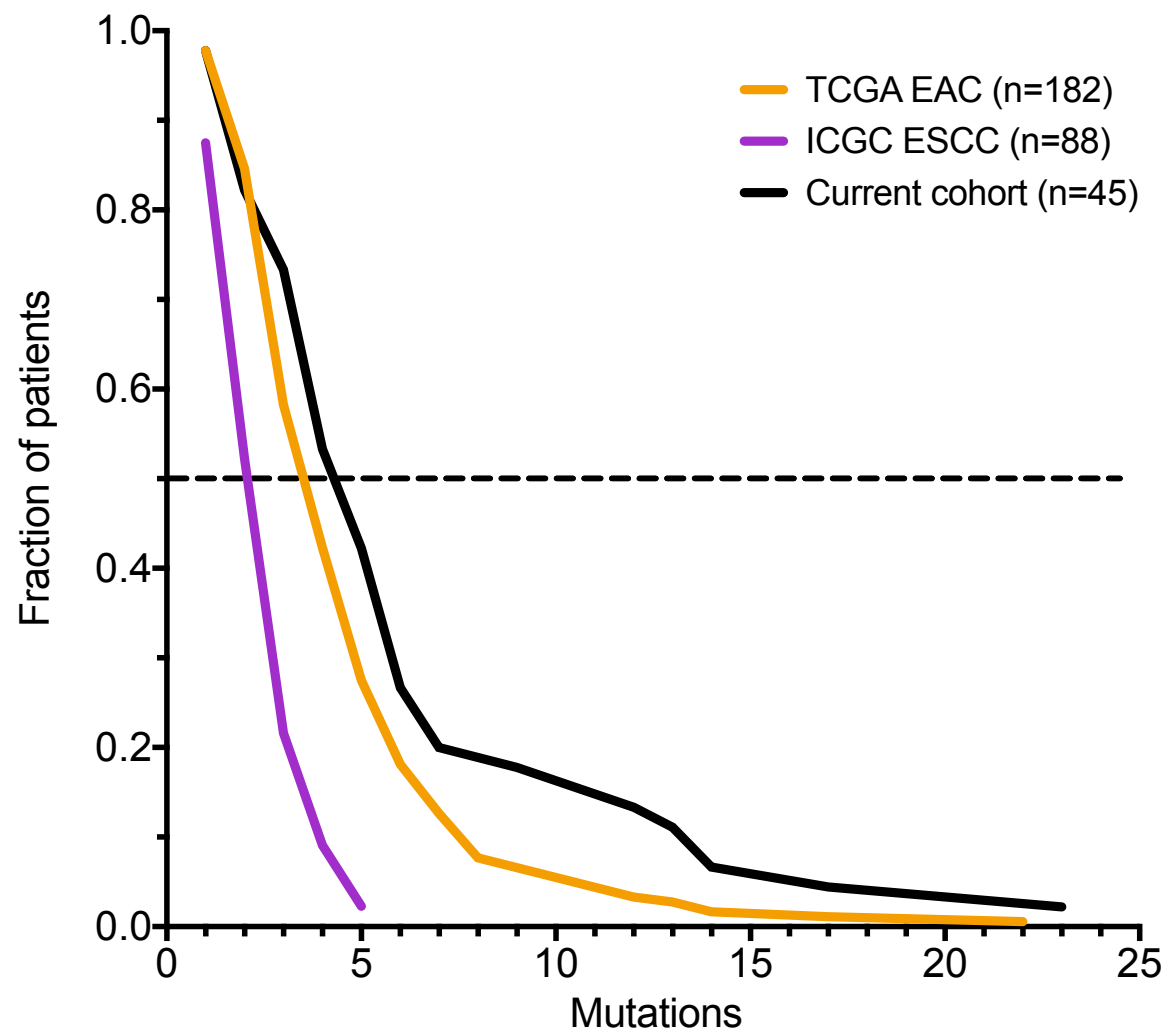

Figure S2

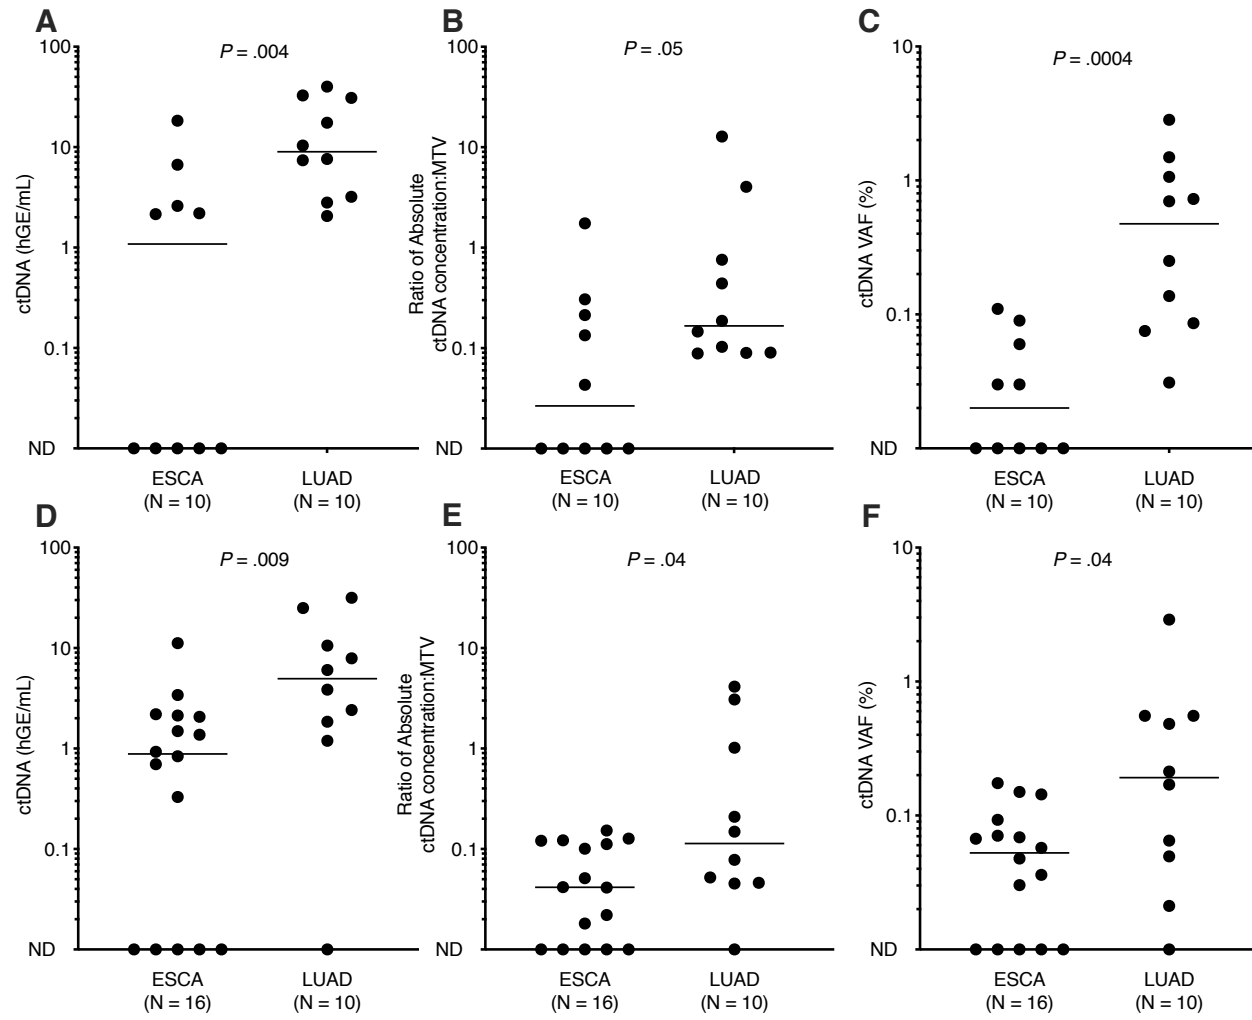

Figure S3

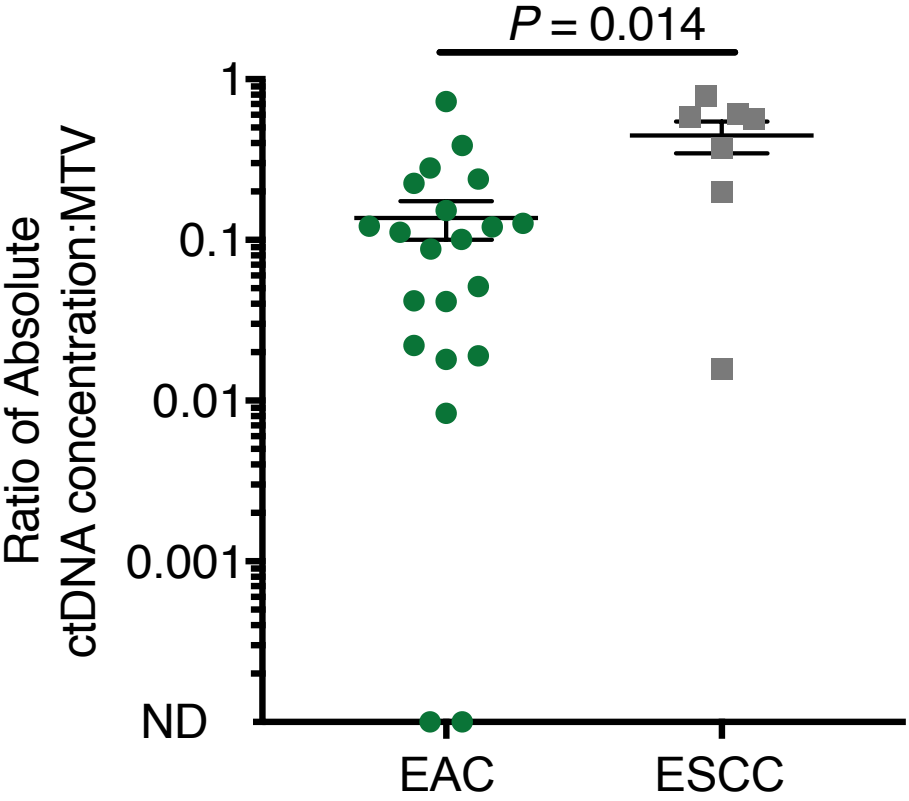

Figure S4

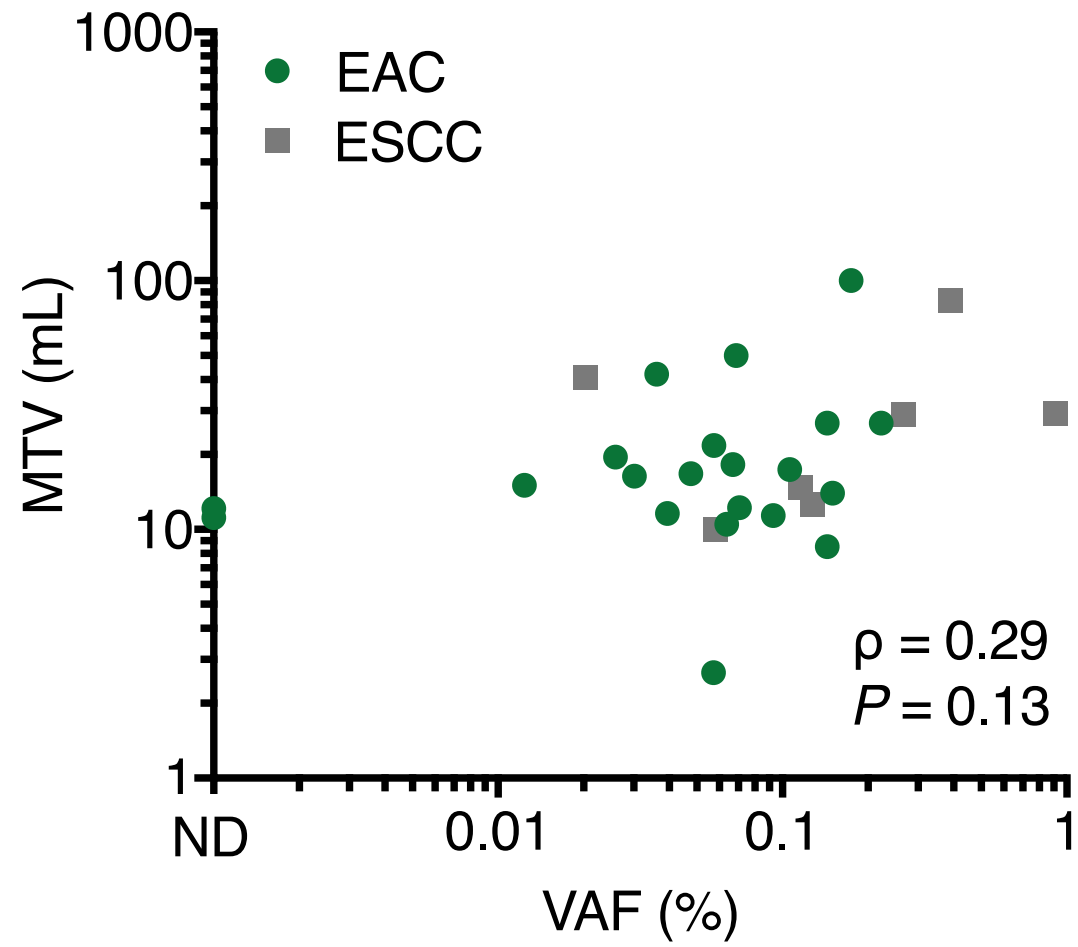

Figure S5

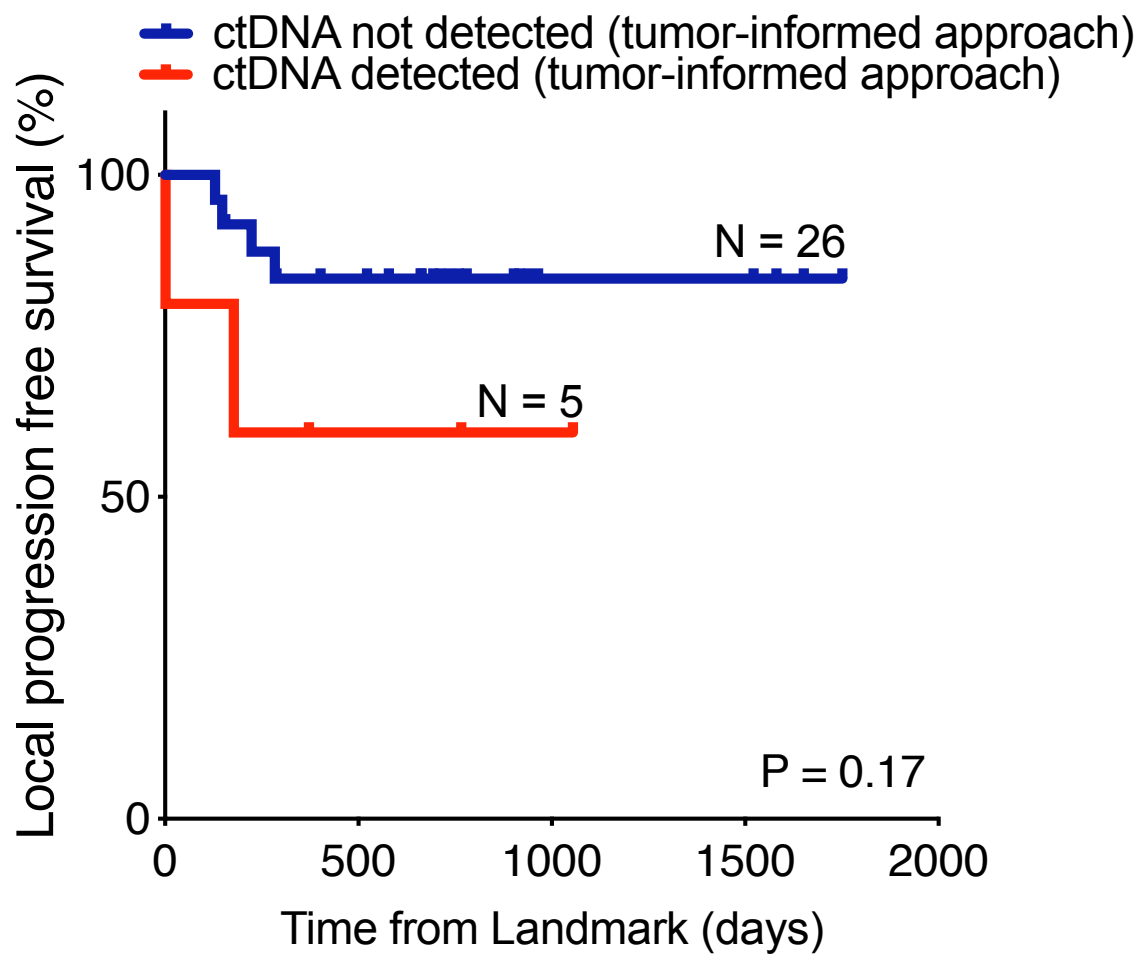

Figure S6

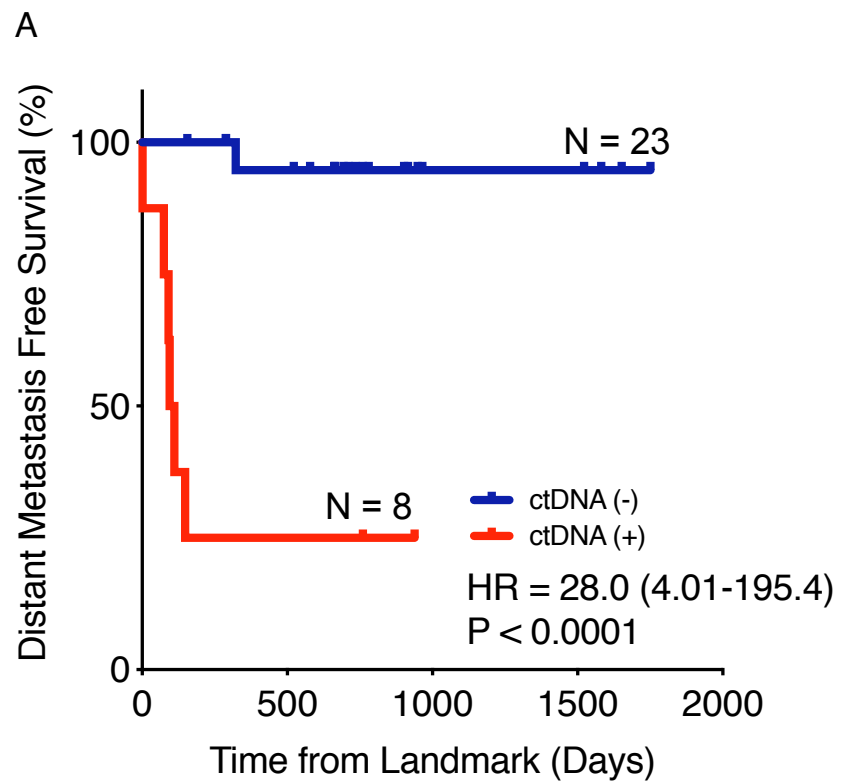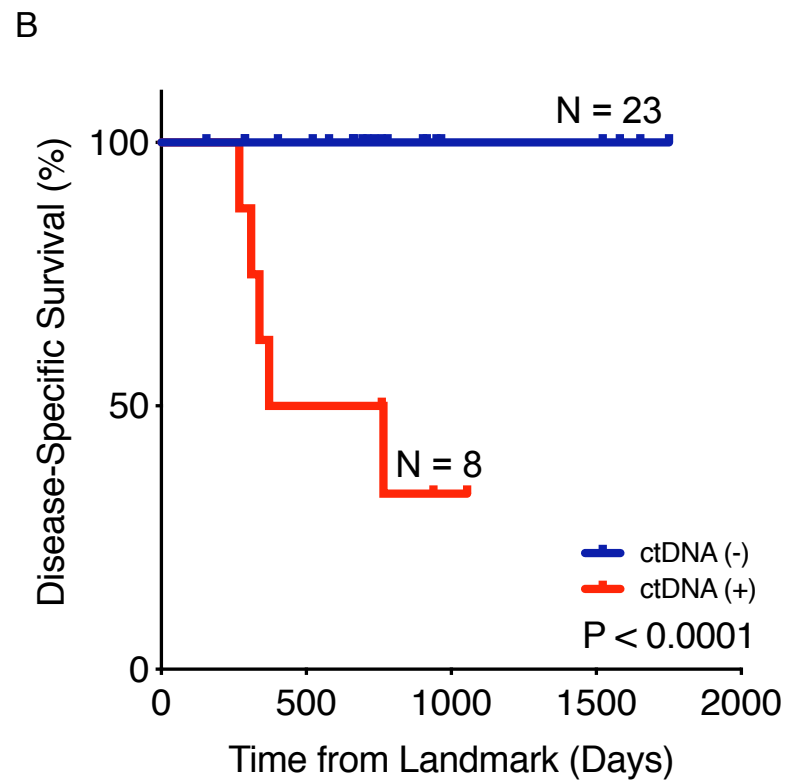

Figure S7

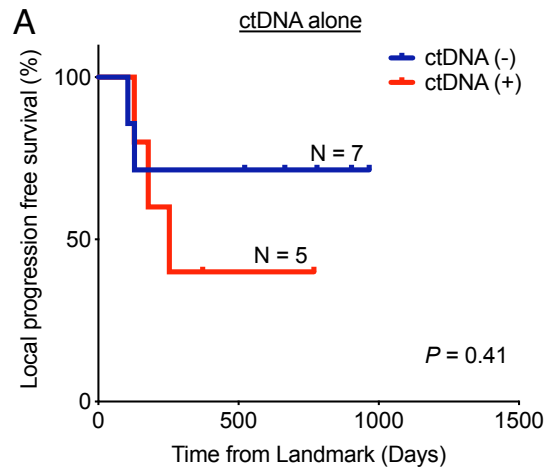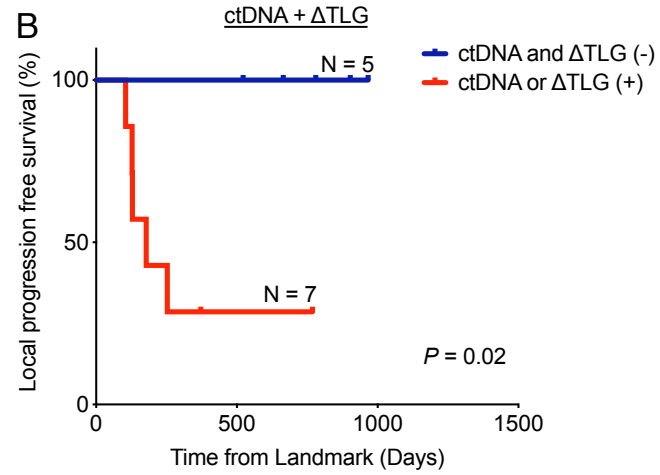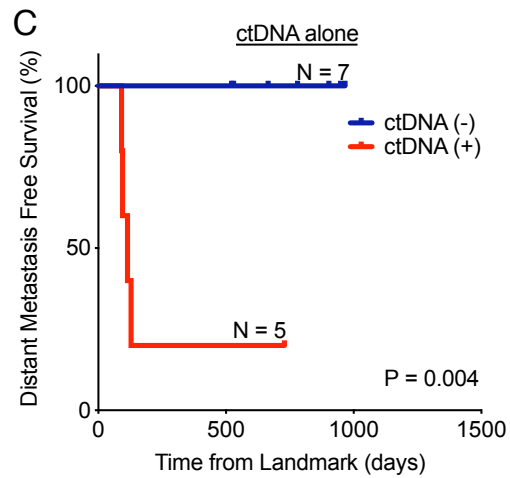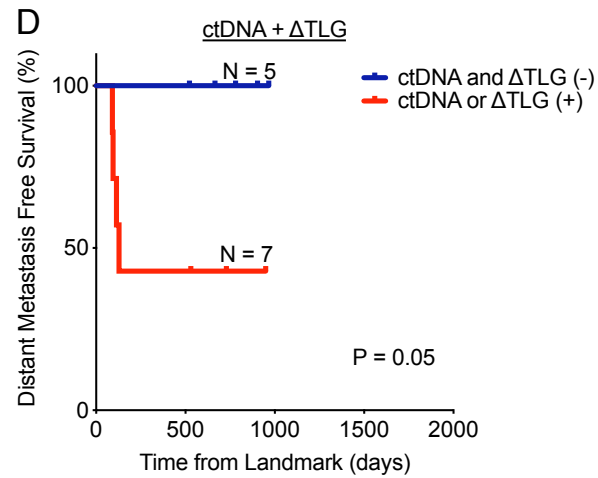

Figure S8

A

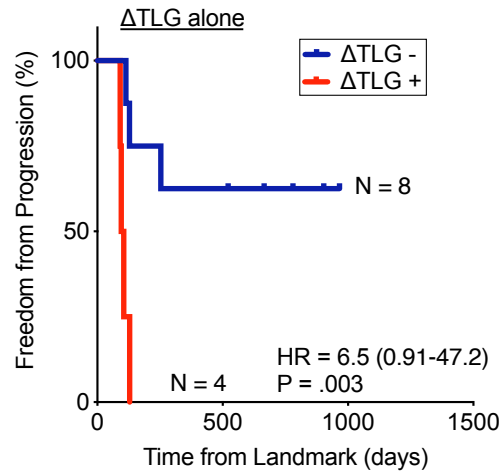

B

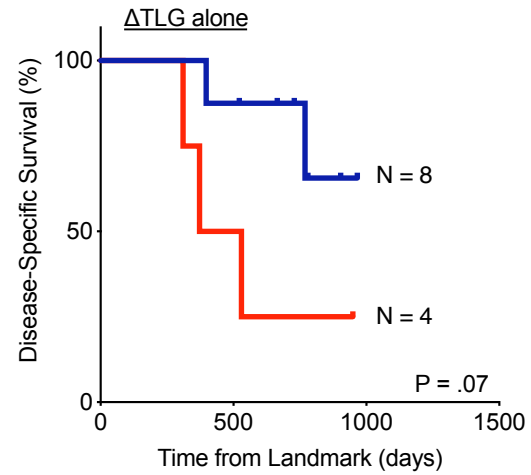

C

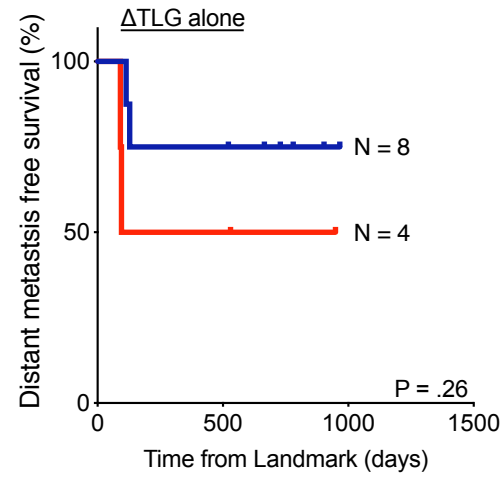

D

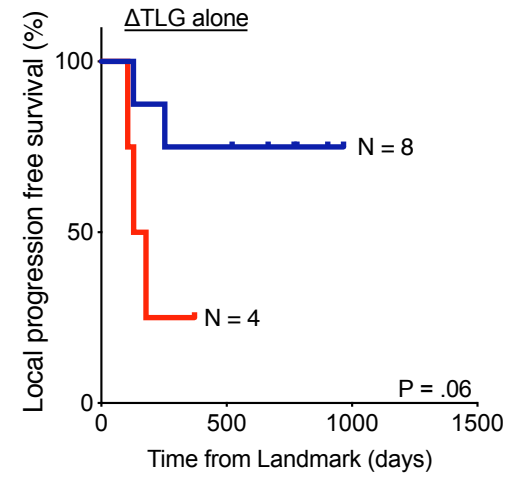

Supplement: NIHMS1542951-supplement-1.pdf [file NIHMS1542951-supplement-1.pdf]
